# Supplementary material for: The eukaryotic MEP-pathway genes are evolutionarily conserved and originated from Chlaymidia and cyanobacteria
Source: PubMed Central journal article supplement (PMC7912892; doi:10.1186/s12864-021-07448-x), 2021-02-26
Supplement: 12864_2021_7448_MOESM1_ESM.pdf [file 12864_2021_7448_MOESM1_ESM.pdf]

Eukaryotes

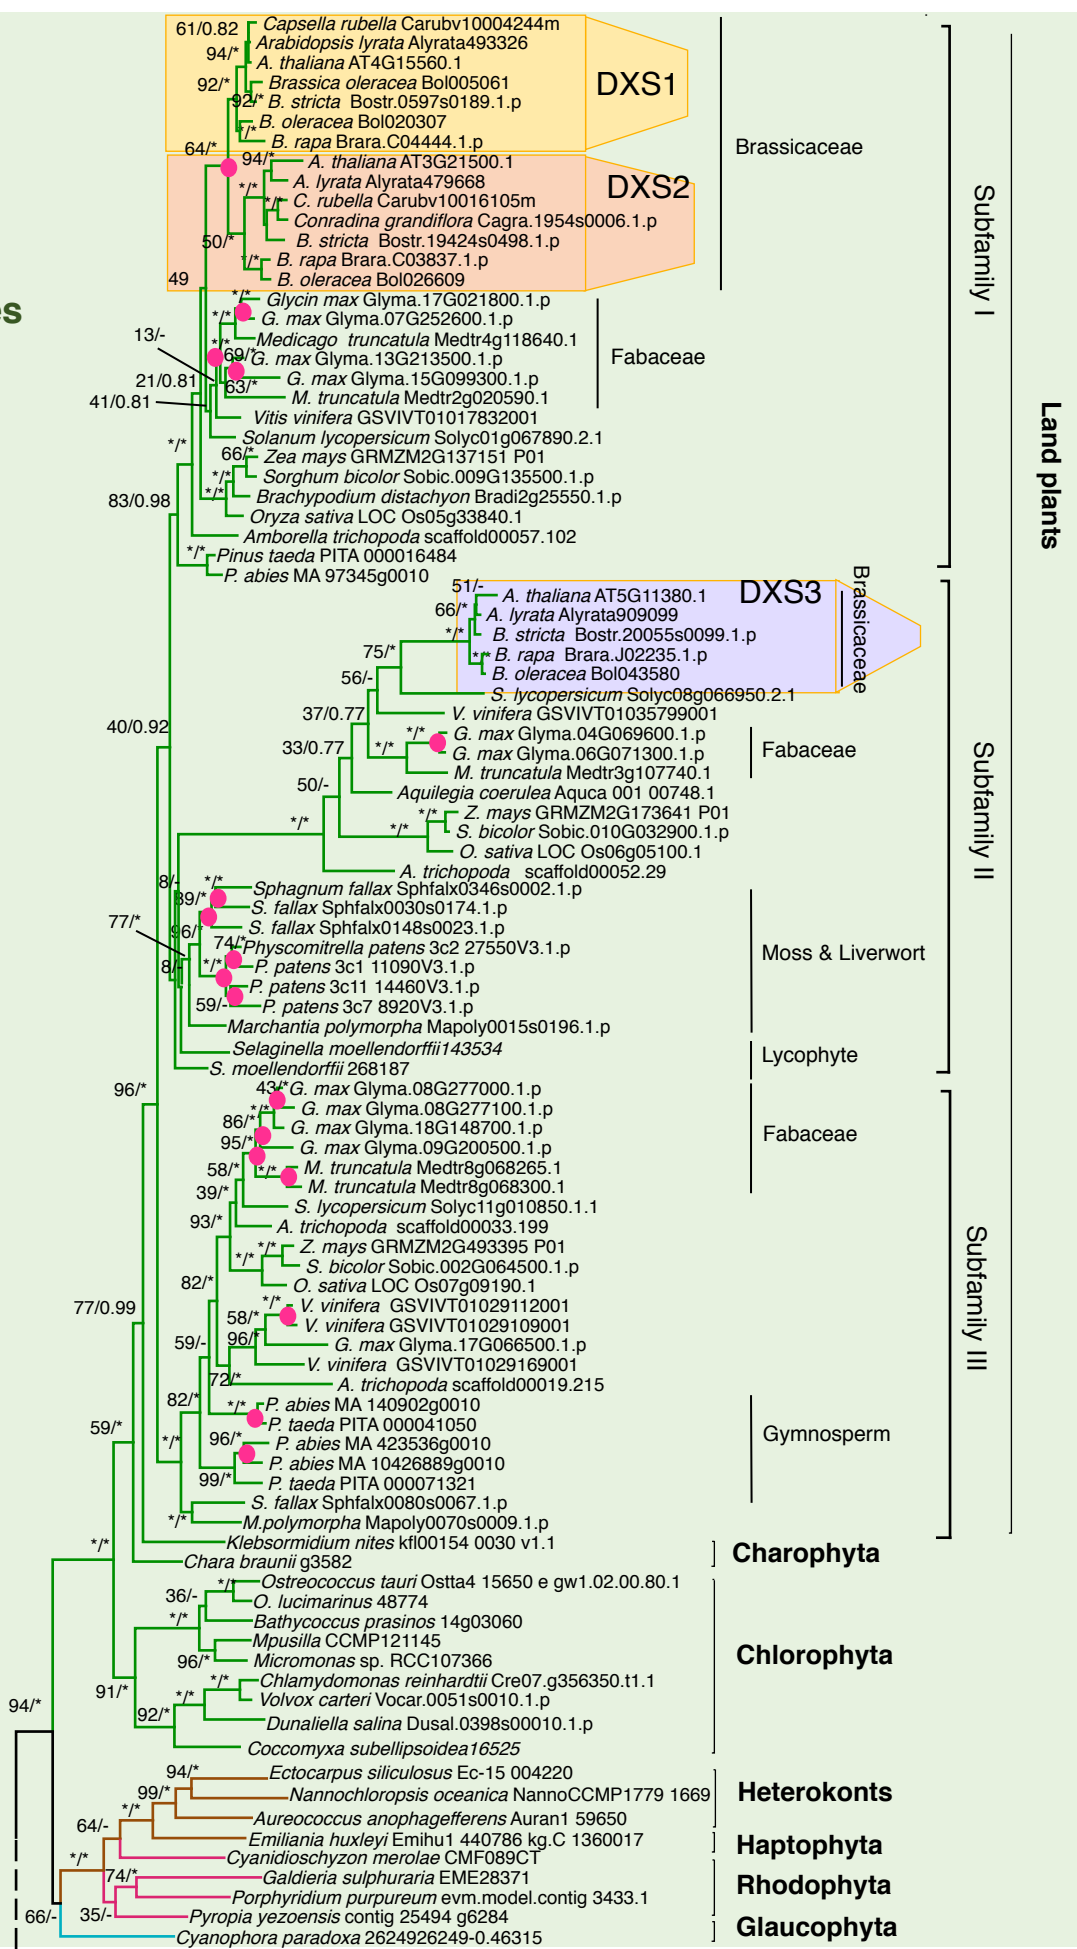

Continue to next page

Continued

Other-eubacteria

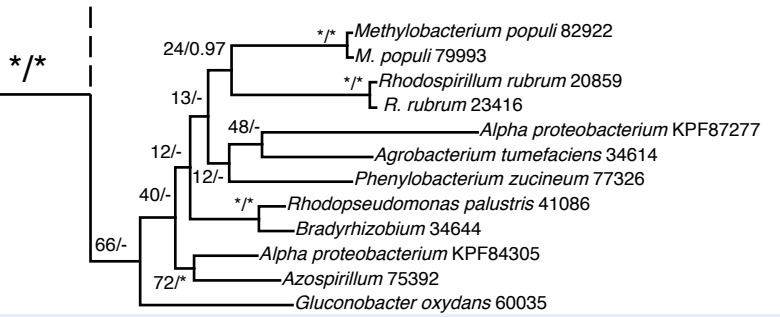

alpha-proteobacteria

PVC group

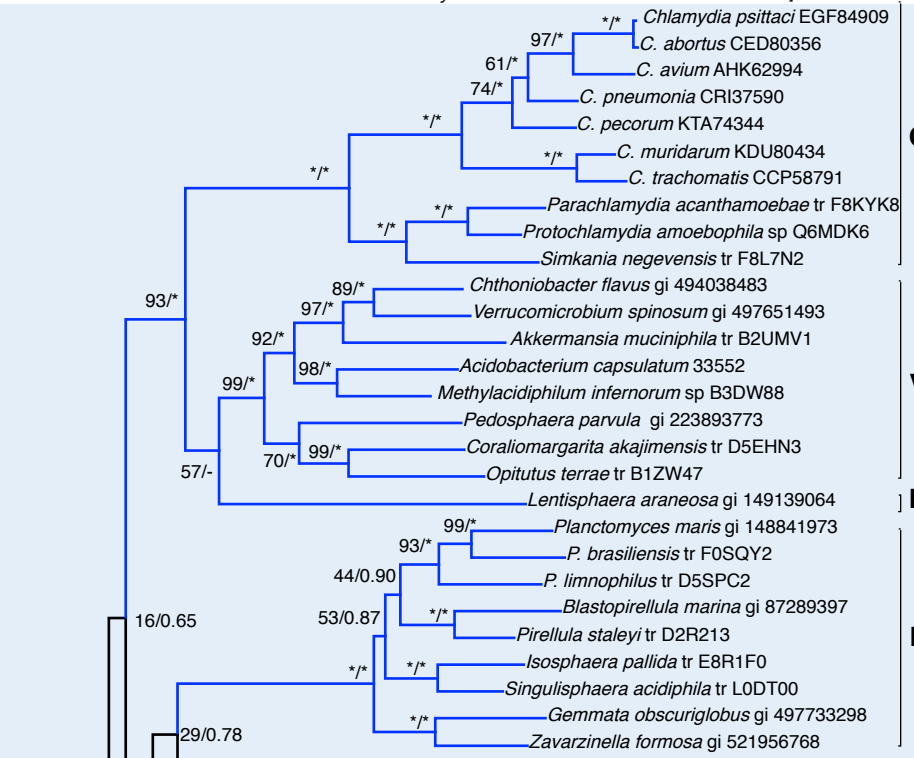

Chlamydia

Verrucomicrobia

Lentisphaetae

Planctomycetes

Cyano-bacteria

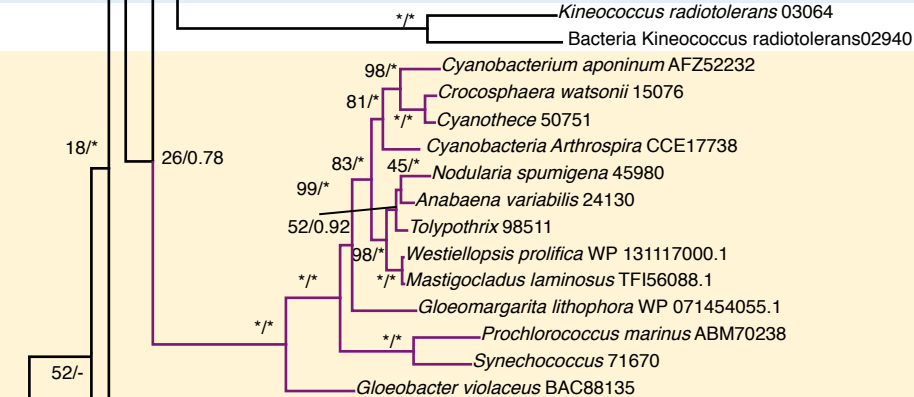

Other eubacteria

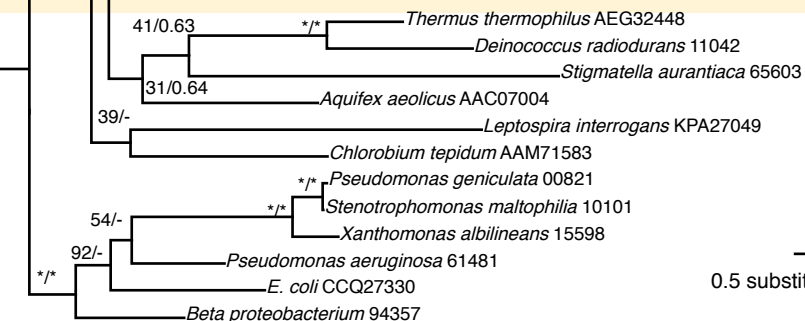

0.5 substitution site per site

**Figure S1. Phylogenetic tree of DXS.** Numbers associated with branches are bootstrap values (BS, on the left) obtained by RAxML and the posterior probability (PP, on the right) obtain by MrBayes. Taxa in different major groups are shaded in different colors. The star is the BS=100 or PP=1.0. Pink-filled circle indicates gene duplication. Dash means the topology is different between two methods.

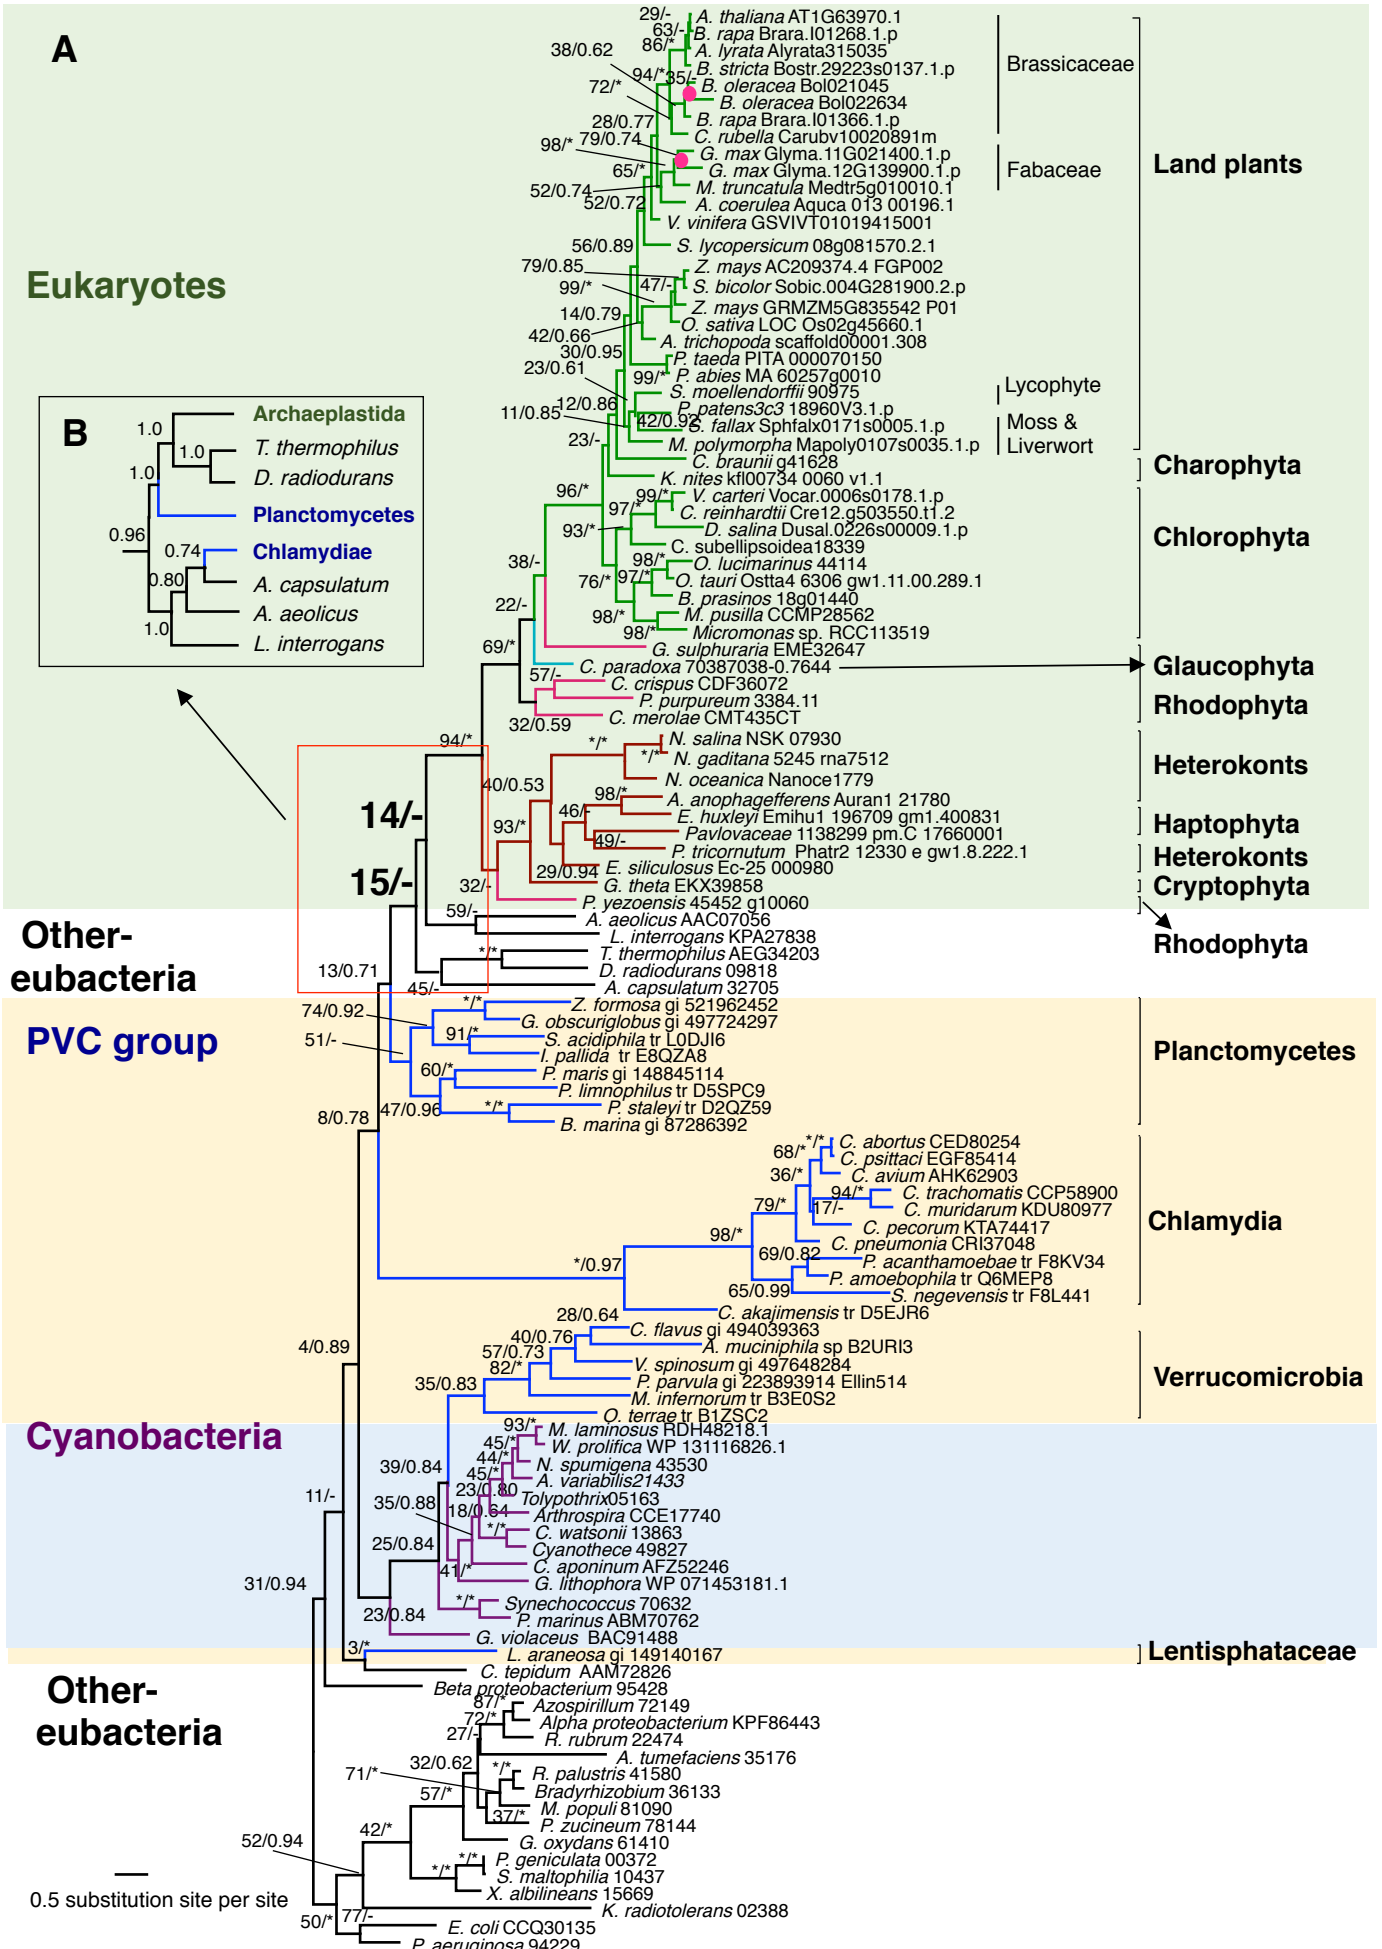

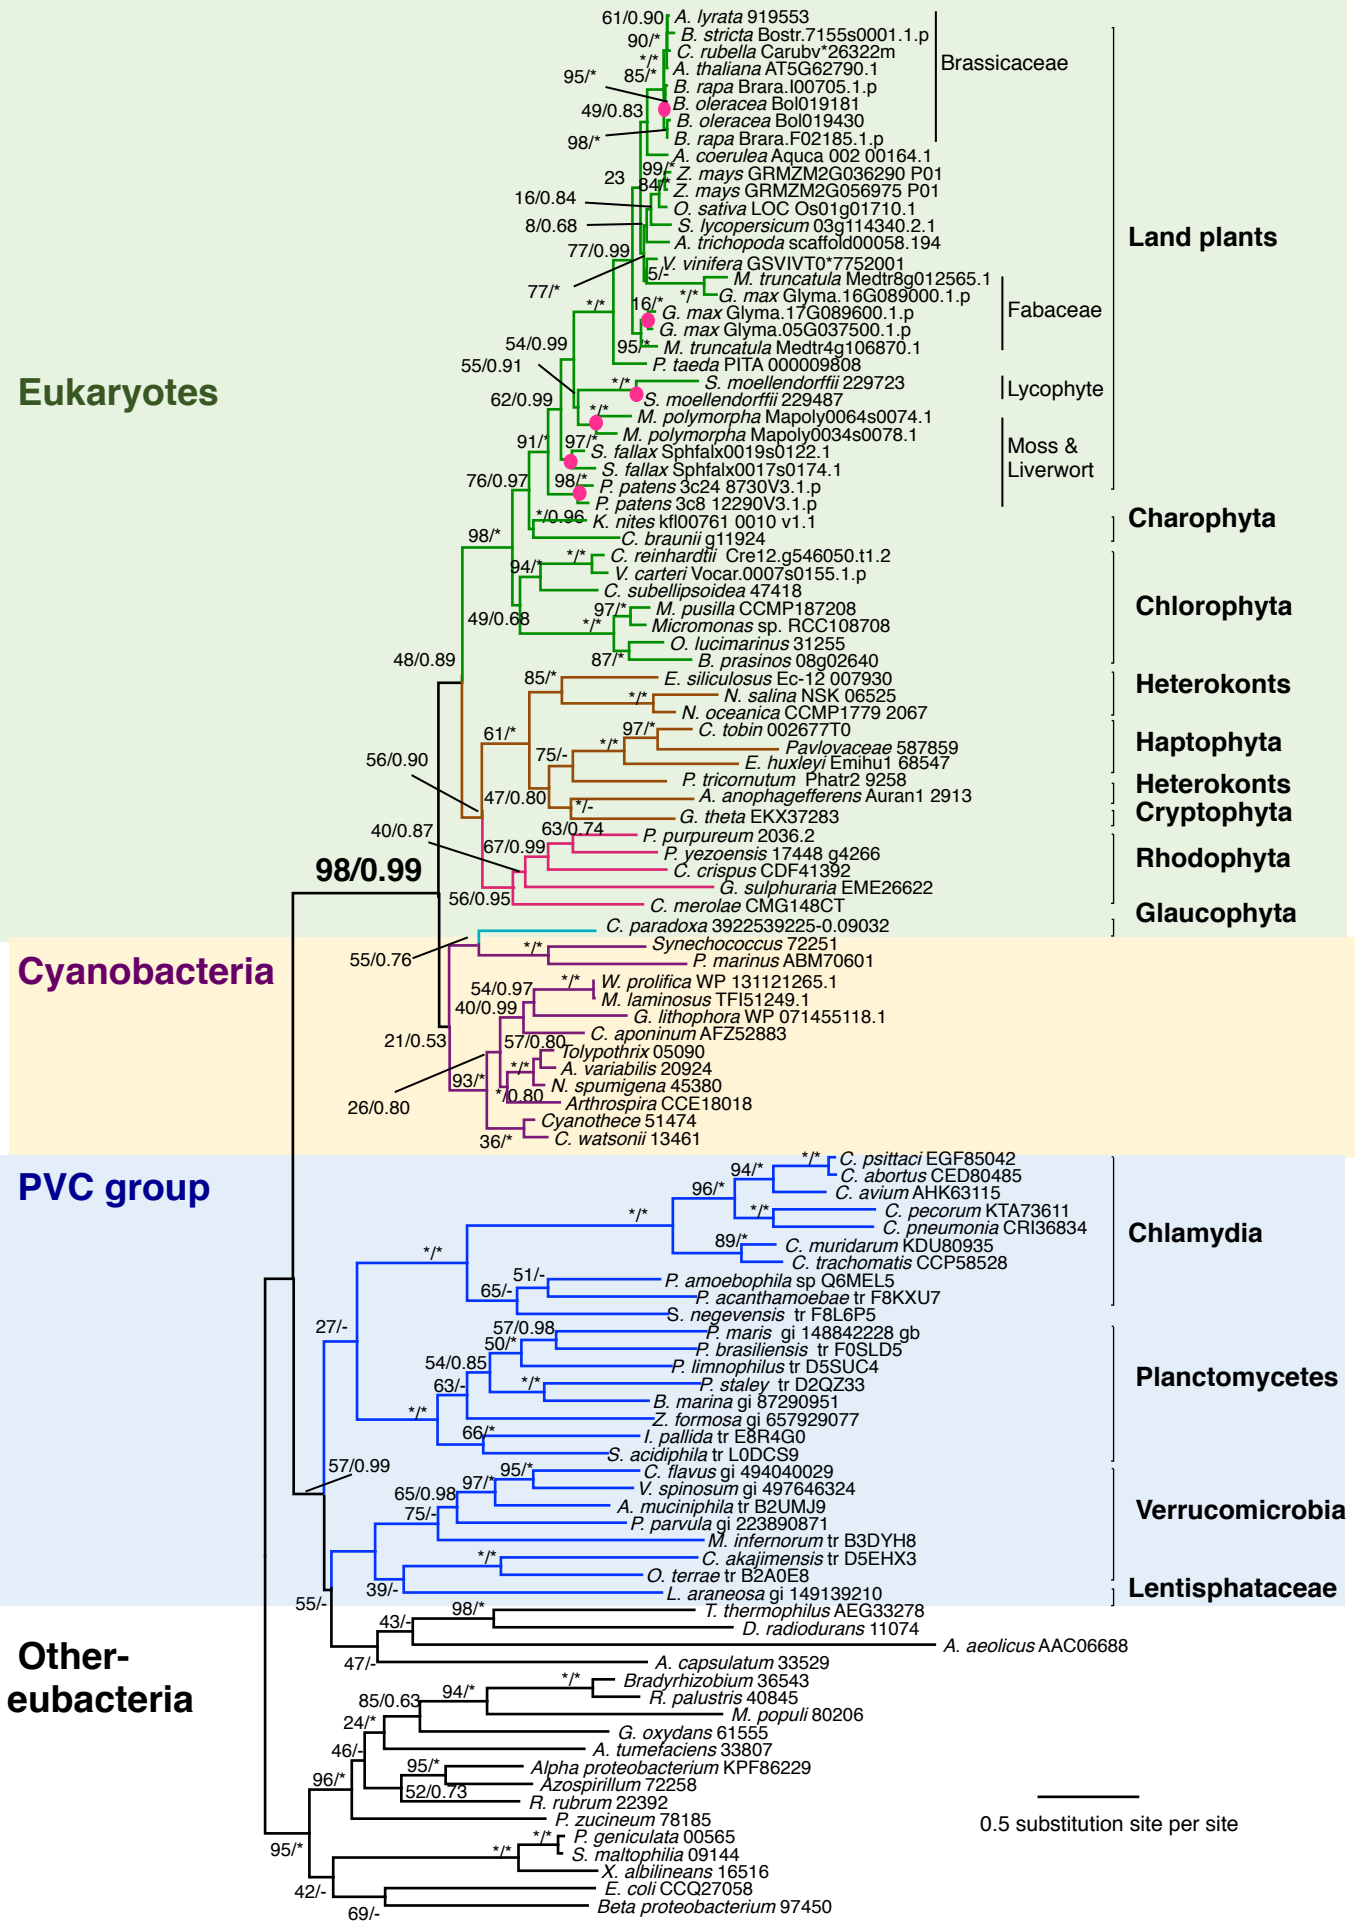

**Figure S3. Phylogenetic tree of DXR.** Numbers associated with branches are BS values (on the left) obtained by RAxML and the PP values (on the right) obtain by MrBayes. Taxa in different major groups are shaded in different colors. The star is the BS=100 or PP=1.0. Pink-filled circle indicates gene duplication. Dash means the topology is different between two methods.

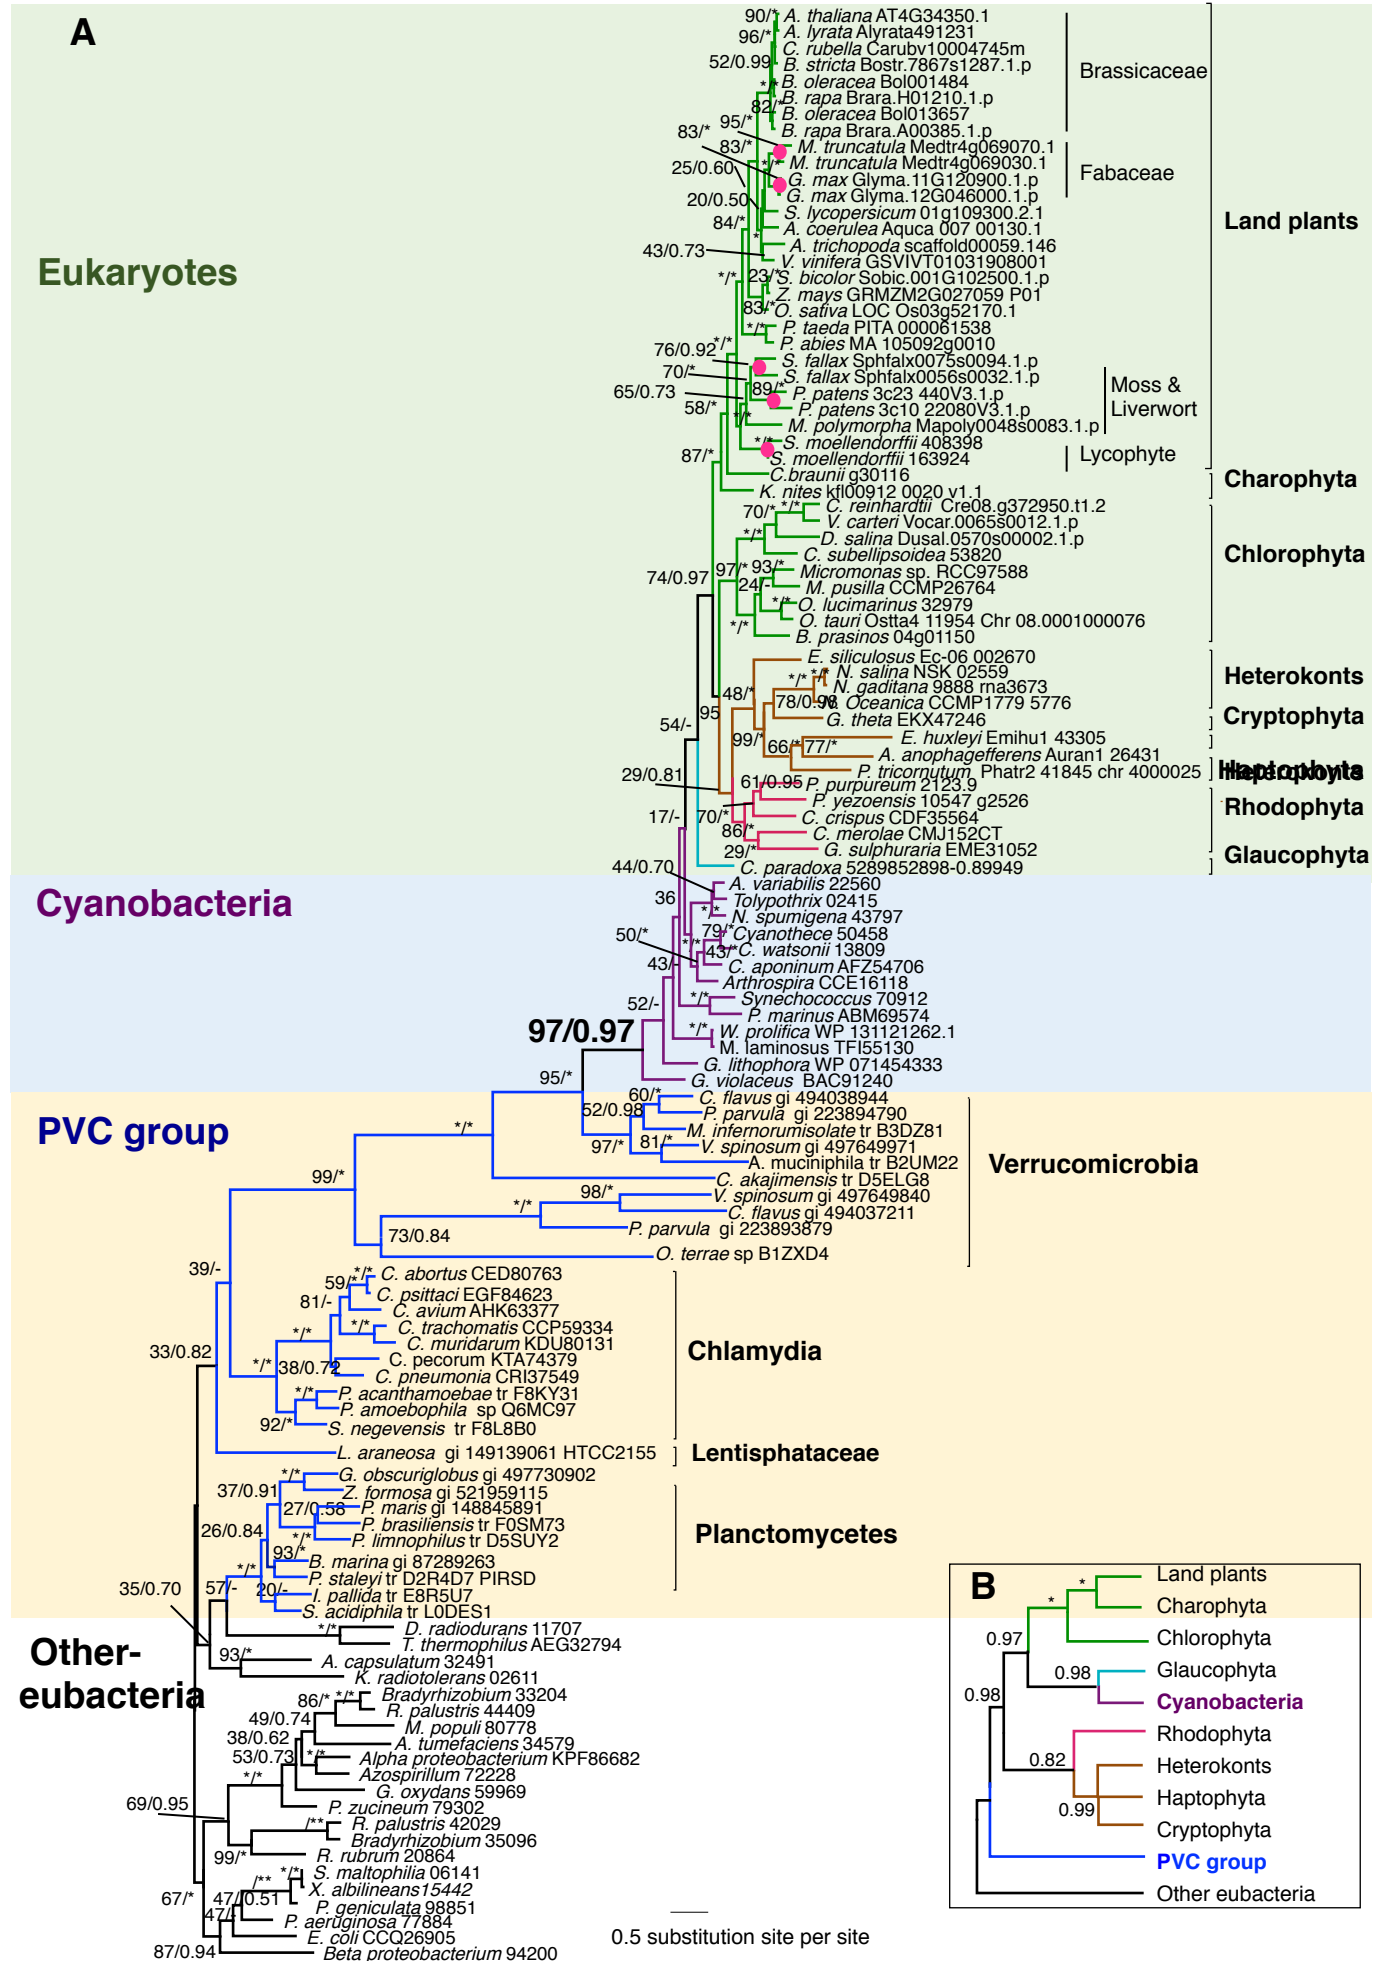

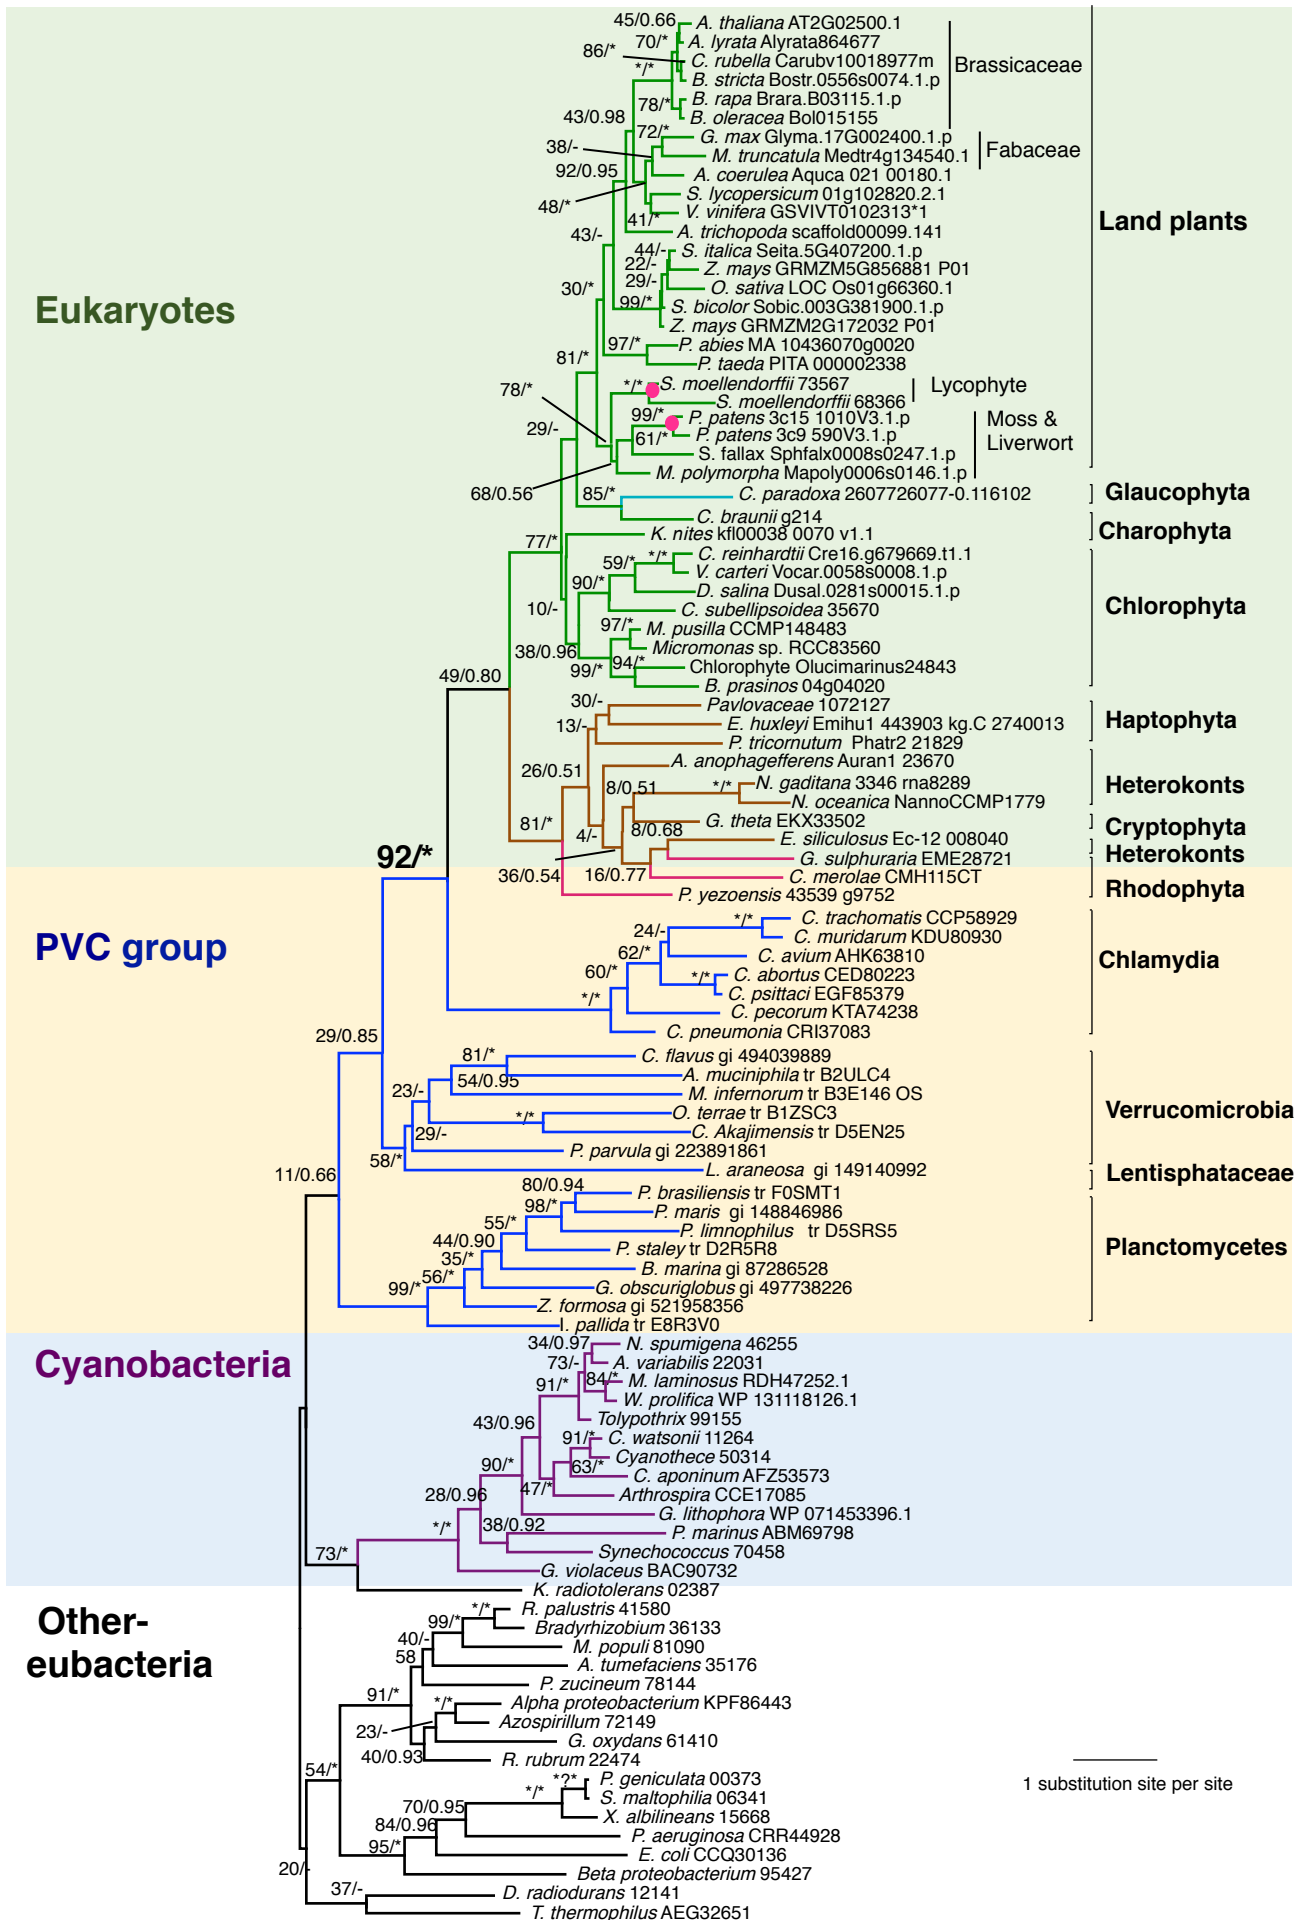

**Figure S5. Phylogenetic tree of CMS.** Numbers associated with branches are BS values (on the left) obtained by RAxML and the PP values (on the right) obtained by MrBayes. Taxa in different major groups are shaded in different colors. The star is the BS=100 or PP=1.0. Dash means the topology is different between two methods.

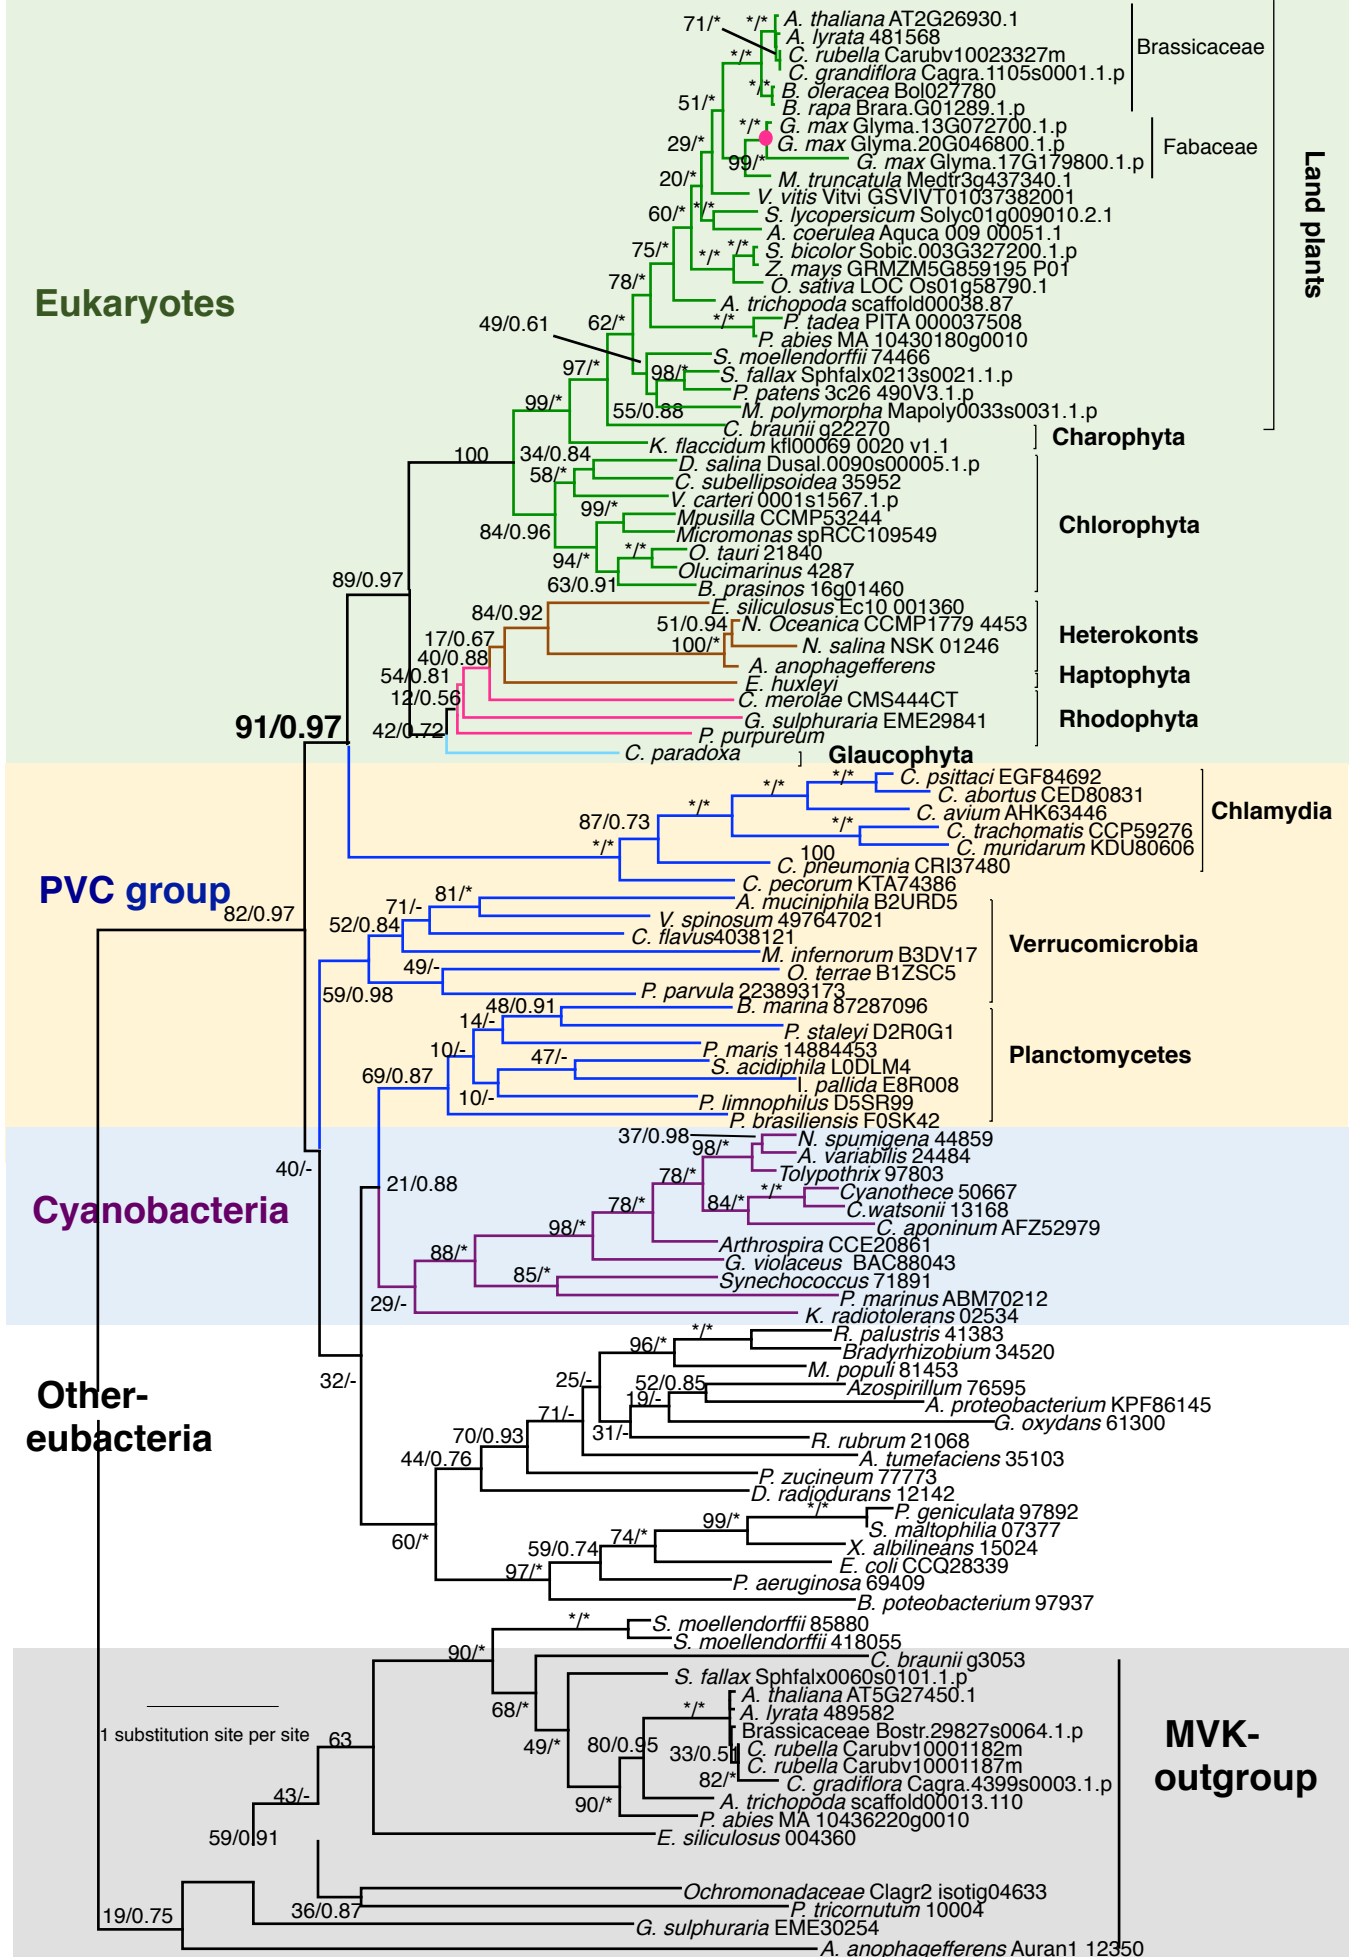

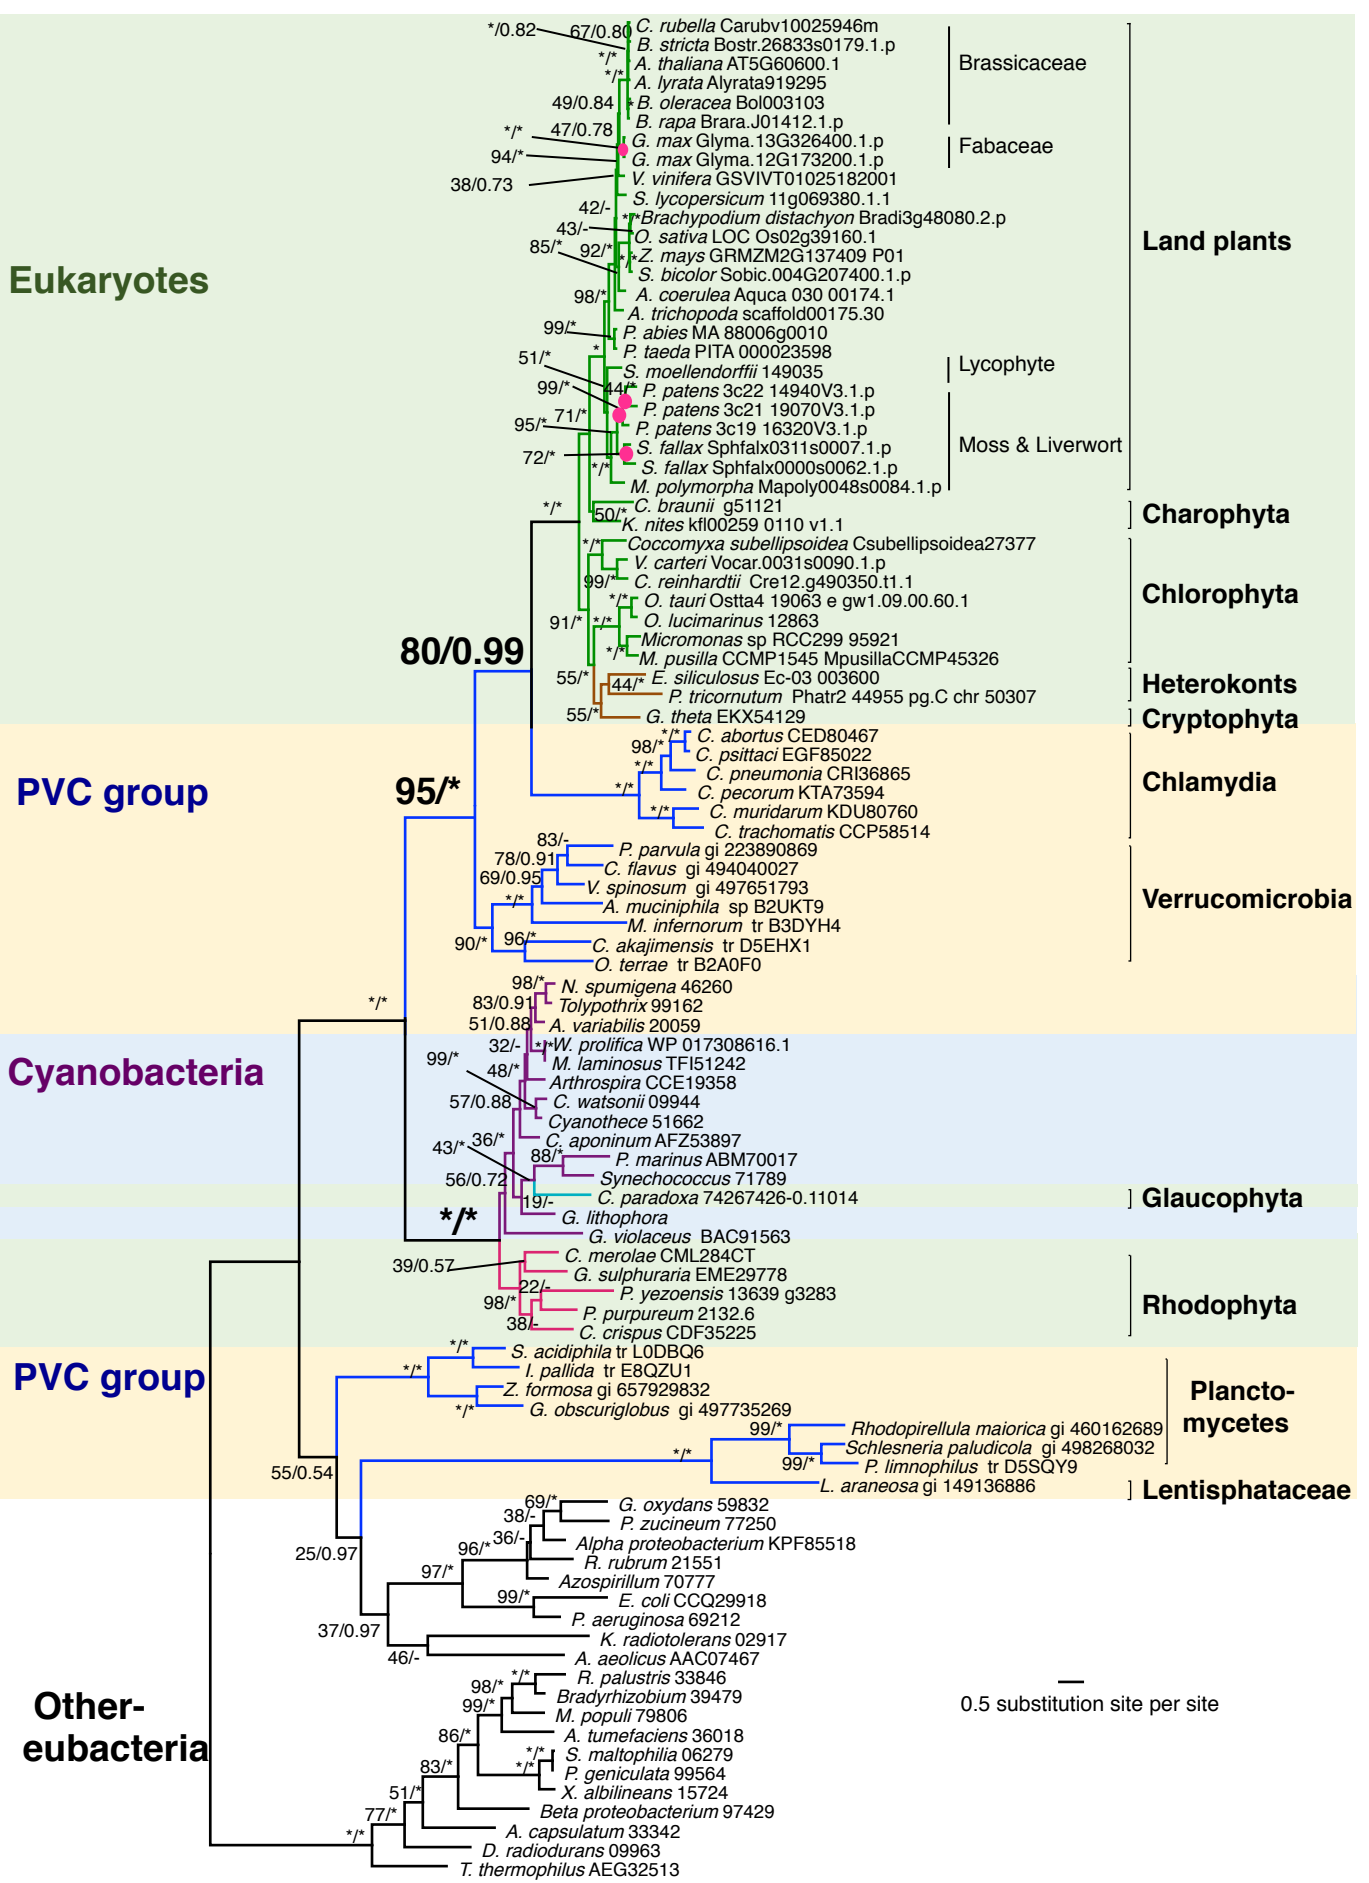

**Figure S7. Phylogenetic tree of HDS.** Numbers associated with branches are BS values (on the left) obtained by RAxML and the PP values (on the right) obtained by MrBayes. Taxa in different major groups are shaded in different colors. The star is the BS=100 or PP=1.0. The dash is the topology is different obtained by MrBayes. Pink-filled circle indicates gene duplication. Dash means the topology is different between two methods.
